# Supplementary material
Source: publisher figshare collection journal article supplement (https://acs.figshare.com/ndownloader/files/4041763)
Supplement: Supplementary file 1 [file 4041763]

| Scaffold Type | Ac-DEX Concentration (g/mL) | Flow Rate (mL/hr) | Fiber Width ( $\mu\text{m}$ ) |
|---------------|-----------------------------|-------------------|-------------------------------|
| Ac-DEX Fast   | 0.3                         | 2                 | $3.1 \pm 1.5$                 |
|               | 0.3                         | 4                 | $2.8 \pm 1.4$                 |
|               | 0.4                         | 1                 | $6.8 \pm 1.7$                 |
|               | 0.4                         | 2                 | $5.6 \pm 2.2$                 |
|               | 0.4                         | 4                 | $5.3 \pm 1.2$                 |
|               | 0.4                         | 6                 | $7.9 \pm 1.6$                 |
|               | 0.4                         | 8                 | $8.6 \pm 1.1$                 |
|               | 0.4                         | 10                | $8.4 \pm 1.2$                 |
|               | 0.5                         | 2                 | $7.6 \pm 2.2$                 |
|               | 0.5                         | 4                 | $6.8 \pm 1.4$                 |
| Ac-DEX Slow   | 0.4                         | 1                 | $5.6 \pm 1.0$                 |
|               | 0.4                         | 2                 | $6.5 \pm 0.5$                 |
|               | 0.4                         | 4                 | $6.4 \pm 0.3$                 |
|               | 0.4                         | 6                 | $7.3 \pm 0.8$                 |
|               | 0.4                         | 8                 | $9.1 \pm 1.0$                 |
|               | 0.4                         | 10                | $10.0 \pm 1.0$                |

**Table S1.** Effect of electrospinning conditions on Ac-DEX fiber morphology. Values are presented as mean  $\pm$  standard deviation (sample size between 14 and 57 fibers).
